# Supplementary material for: A PEO-assisted electrospun silicon–graphene composite as an anode material for lithium-ion batteries
Source: Royal Society of Chemistry journal article supplement (doi:10.1039/c3ta11720k), 2013-01-01
Supplement: c3ta11720k.pdf [file c3ta11720k.pdf]

Electronic Supplementary Information for

## **PEO-assisted electrospun silicon/graphene composite as an anode material for lithium-ion batteries**

Xiaosi Zhou and Yu-Guo Guo\*

CAS Key Laboratory of Molecular Nanostructure and Nanotechnology,  
Beijing National Laboratory for Molecular Sciences (BNLMS),  
Institute of Chemistry, Chinese Academy of Sciences (CAS),  
Beijing 100190, P. R. China  
E-mail: [ygguo@iccas.ac.cn](mailto:ygguo@iccas.ac.cn)

### **Experimental Section**

*Synthesis of graphite oxide:* The graphite oxide was prepared from natural graphite flake (Alfa Aesar, 325 mesh) by using a modified Hummers method.<sup>1</sup>

*Synthesis of Si nanoparticle-graphene-carbon nanodot composite (Si-G-C):* 3.0 mL of graphite oxide aqueous suspension (10.0 mg mL<sup>-1</sup>) was first dispersed in 13.5 mL of deionized (DI) water under sonication, followed by addition of 0.45 g of polyethylene oxide (PEO). The mixture was continuously stirred to form a homogeneous suspension. Then 0.2 g of silicon nanoparticles was added to the above suspension, followed by vigorous stirring. After 1 h sonication, a homogeneous yellow mixture was obtained. The resulting mixture was inhaled into a 10 mL syringe with a 17-gauge blunt tip needle. The flow rate of the mixture was 1 mL h<sup>-1</sup> controlled by a syringe pump (KD Scientific, KDS-100, USA). A voltage of 20 kV (Spellman, SL50P, USA) was applied between the needle and the aluminium foil of approximately 15 cm×15 cm, which was grounded and employed to collect the electrospun nanofibers. The as-collected electrospun nanofibers was heated at 1000 °C in argon atmosphere for 1 h to reduce the graphene oxide and decompose the PEO. The heating rate for the reduction and decomposition were 10 °C min<sup>-1</sup>. After being naturally cooled to room temperature, the black product was mixed with 10% HF water/ethanol (1/3 v/v) solution for 30 min to remove the SiO<sub>x</sub> on the surface of Si nanoparticles to finally obtain Si-G-C.<sup>2</sup>

*Synthesis of graphene-carbon nanodot composite (G-C):* G-C was produced using the same procedure as for Si-G-C except that Si nanoparticles were not added.

*Synthesis of graphene (G):* 3.0 mL of graphite oxide aqueous suspension (10.0 mg mL<sup>-1</sup>) was first dispersed in 13.5 mL of deionized (DI) water under sonication, followed by freeze-drying. The resulting brown powder was heated at 1000 °C in argon atmosphere for 1 h to achieve G.

*Characterization and Electrochemical measurements:* SEM measurements were conducted on a Hitachi S-4800 field emission scanning electron microscope operated at 15 kV. TEM and HRTEM characterizations were carried out on a Tecnai G2 F20 U-TWIN field emission transmission electron microscope operated at 200 kV. Thermogravimetric (TG) analysis was performed on TA-Q50 and NETZSCH STA 409 PC/PG instruments. XRD patterns were recorded on a Rigaku D/max2500 diffractometer using Cu K $\alpha$  radiation. XPS spectra were determined on an ESCALab220i-XL electron spectrometer from VG Scientific using 300W Al K $\alpha$  radiation. Nitrogen adsorption and desorption isotherms at 77.3 K were obtained with a Nova 2000e surface area-pore size analyzer. Electrochemical experiments were carried out using Swagelok-type cells. To make working electrodes, Si-G-C composite, Super-P carbon black, and sodium alginate binder (MP Biomedicals LLC, USA) with mass ratio of 65:20:15 were added to water, and mixed into homogeneous slurry with mortar and pestle. The resulting slurry was pasted onto pure Cu foil. The electrolyte was 1 M LiPF<sub>6</sub> in EC/DMC (1:1 v/v) (Novolyte Technologies) with 2% vinylene carbonate (VC, Aldrich) as the electrolyte additive. Glass fibers (GF/D) from Whatman were used as separators and pure lithium metal foil was used as the counter electrode. The Swagelok-type cells were assembled in an argon-filled glove box. Cyclic voltammetry was investigated with an Autolab PG302N electrochemical workstation at a scan rate of 0.1 mV s<sup>-1</sup>. The charge and discharge measurements of the batteries were recorded on an Arbin BT2000 system in the fixed voltage window between 5 mV and 1 V vs. Li<sup>+</sup>/Li under ambient temperature. Electrochemical impedance spectral measurements were determined on a PARSTAT 2273 advanced electrochemical system over the frequency range from 100 kHz to 10 mHz.

## References

1. W. S. Hummers and R. E. Offeman, *J. Am. Chem. Soc.*, 1958, **80**, 1339.
2. X. Zhou, Y.-X. Yin, L.-J. Wan and Y.-G. Guo, *Adv. Energy Mater.*, 2012, **2**, 1086.

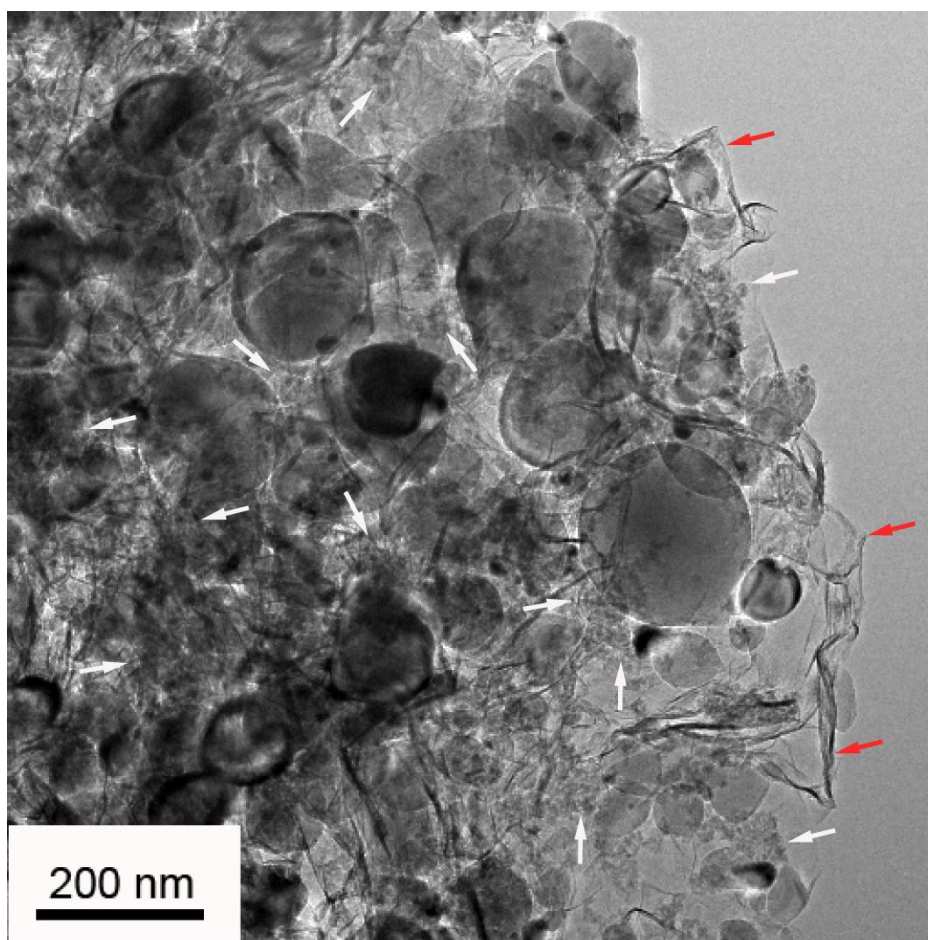

**Figure S1.** TEM image of Si-G-C. The graphene sheets and carbon nanodots are marked with red and white arrows, respectively.

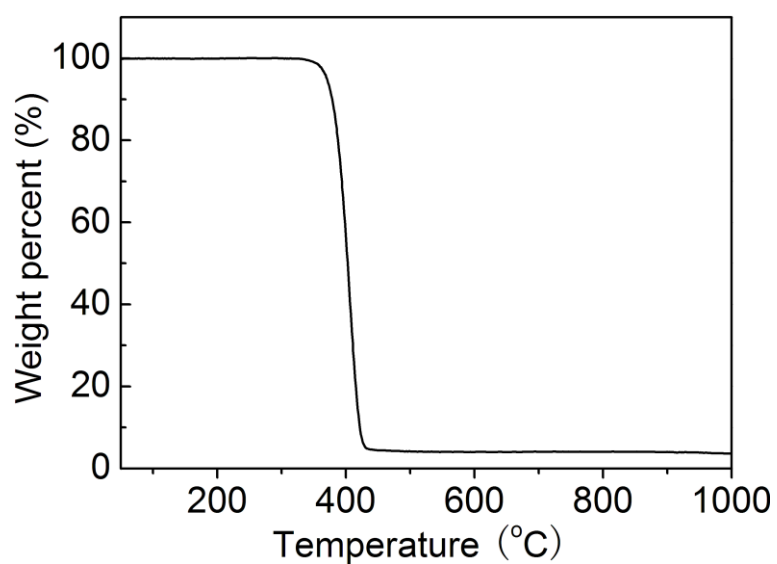

**Figure S2.** TG analysis curve of polyethylene oxide (PEO) under nitrogen atmosphere at a heating rate of  $10\text{ °C min}^{-1}$ . The residual weight percent of PEO at  $1000\text{ °C}$  is about 3.5 wt%.

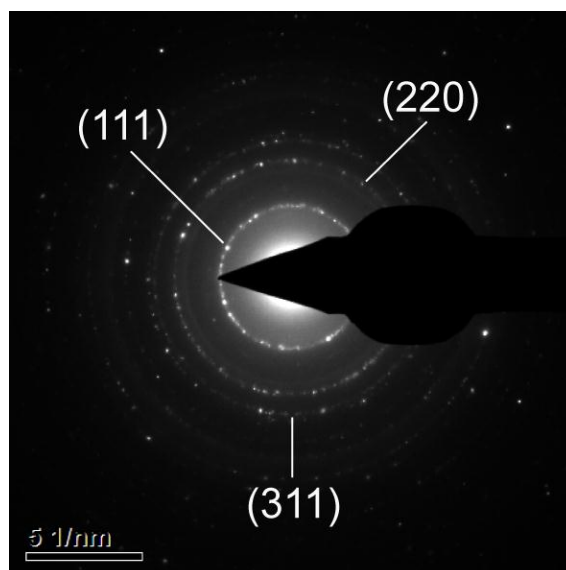

**Figure S3.** SAED pattern of Si-G-C.

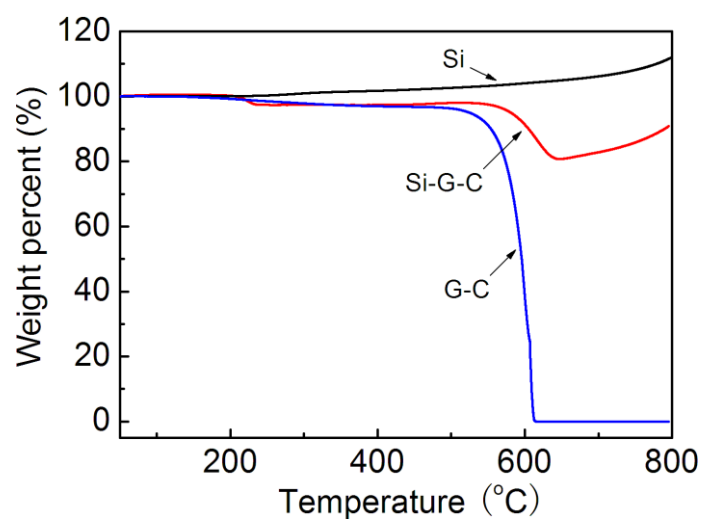

**Figure S4.** TG analysis curves of Si nanoparticles, G-C, and Si-G-C under air atmosphere at a heating rate of 10 °C min<sup>-1</sup>. We could calculate the contents of Si in Si-G-C composite based on the equation  $W_{\text{Si}} * X_{\text{Si}} + W_{\text{G-C}} * (1 - X_{\text{Si}}) = W_{\text{Si-G-C}}$ , where  $W_{\text{Si}}$ ,  $W_{\text{G-C}}$ , and  $W_{\text{Si-G-C}}$  are residual weight percent of Si, G-C, and Si-G-C at 700 °C, and  $X_{\text{Si}}$  is the content of Si in Si-G-C. The contents of Si in the composite is approximately 78.0 wt%.

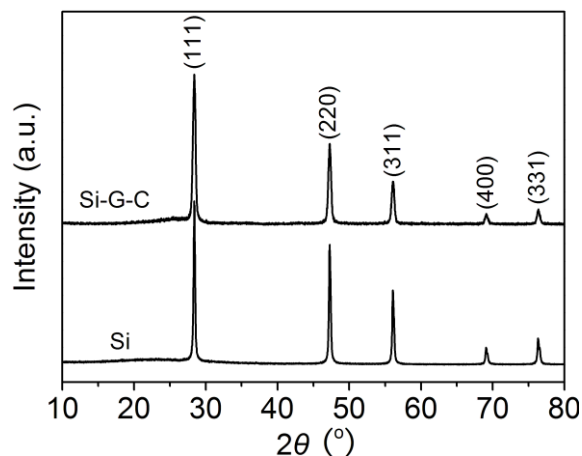

**Figure S5.** a) XRD patterns of Si nanoparticles (Si) and Si-G-C.

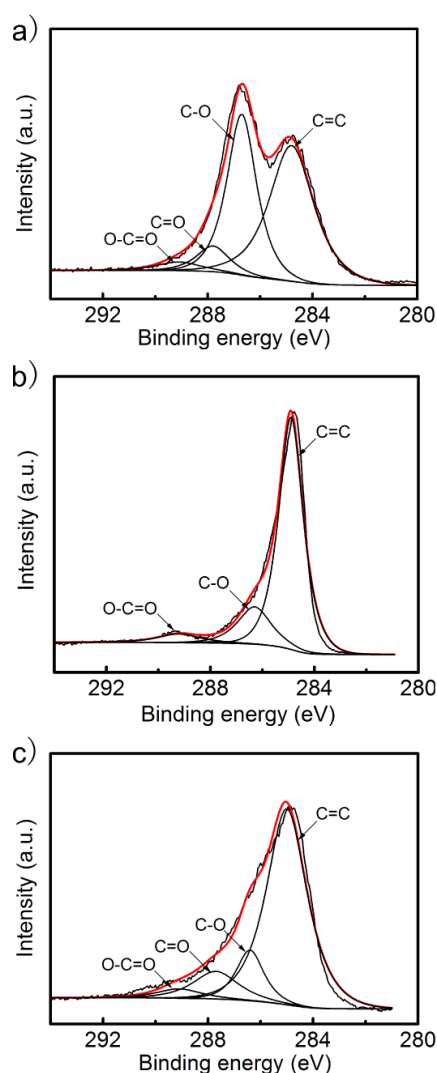

**Figure S6.** XPS C 1s spectra of a) GO, b) G, and b) Si-G-C. the main peaks centered at 284.9 eV corresponding to extensively delocalized  $sp^2$ -hybridized carbon atoms, and the independent peaks with binding energies of 286.4, 287.8, and 289.1 eV can be attributed to carbon atoms in C-O, C=O, and O-C=O, respectively.

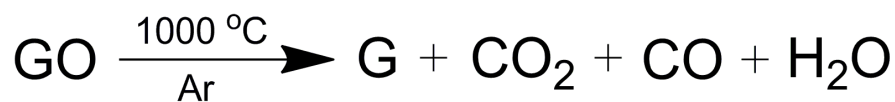

**Scheme S1.** Reaction mechanism for reduction of graphene oxide by heat treatment at 1000 °C in argon atmosphere.

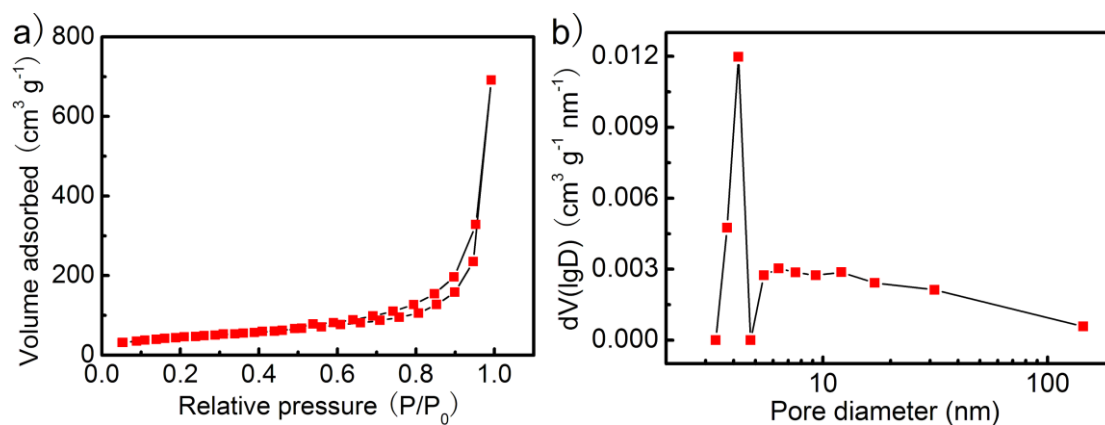

**Figure S7.** a) Nitrogen adsorption/desorption isotherms of Si-G-C, (b) pore-size distribution plot calculated by the BJH formula with the desorption isotherm.

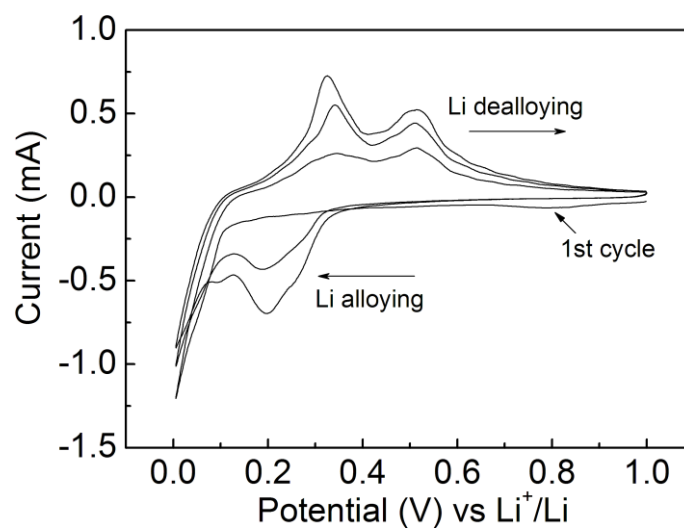

**Figure S8.** CV curves of the initial three cycles of Si-G-C.

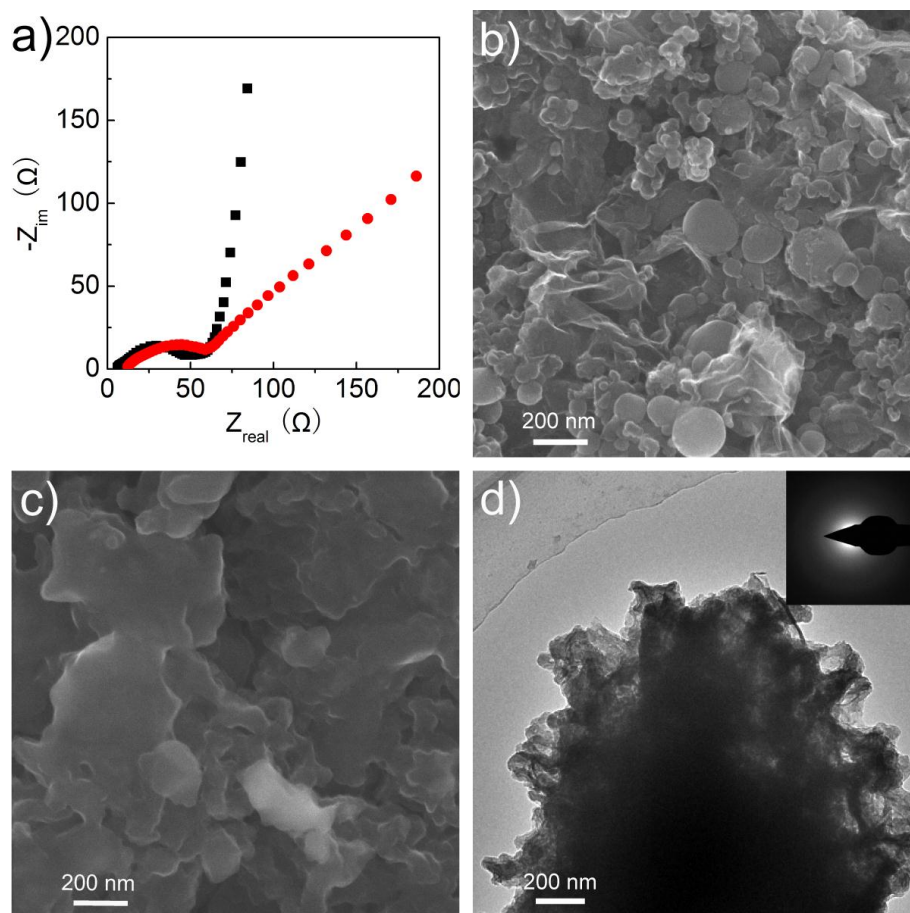

**Figure S9.** a) Nyquist plots of the Si-G-C electrode after 3 cycles (black aquares) and 200 cycles (red circles); b), c) SEM images of the Si-G-C electrode before and after 200 cycles; d) TEM image of the Si-G-C electrode after 200 cycles, the inset shows the corresponding SAED pattern.
